# Supplementary material for: Low-intensity–low-temperature stability assessment of perovskite solar cells operating on simulated Martian surface conditions
Source: Royal Society of Chemistry journal article supplement (doi:10.1039/d2cp01450e), 2022-01-01
Supplement: d2cp01450e1.pdf [file d2cp01450e1.pdf]

# **Low-Intensity-Low-Temperature Stability Assessment of Perovskite Solar Cells Operating on Simulated Martian Surface Conditions**

Mengjie Sun<sup>a,b</sup>, Yifan Zheng<sup>\*b,c</sup>, Yifeng Shi<sup>b</sup>, Guodong Zhang<sup>b,c</sup>, Yuchuan Shao<sup>\*a,b,c</sup>

<sup>a</sup> *School of Physics and Optoelectronic Engineering, Hangzhou Institute for Advanced Study, UCAS; 310024, Hangzhou, China*

<sup>b</sup> *Key Laboratory of Materials for High-Power Laser, Shanghai Institute of Optics and Fine Mechanics, Chinese Academy of Sciences; 201800, Shanghai, China*

<sup>c</sup> *Center of Materials Science and Optoelectronics Engineering, University of Chinese Academy of Sciences; 100049, Beijing, China*

Correspondence to: Prof. Yifan Zheng, Prof. Yuchuan Shao

Email: [yifan.zheng@siom.ac.cn](mailto:yifan.zheng@siom.ac.cn); [shaoyuchuan@siom.ac.cn](mailto:shaoyuchuan@siom.ac.cn)

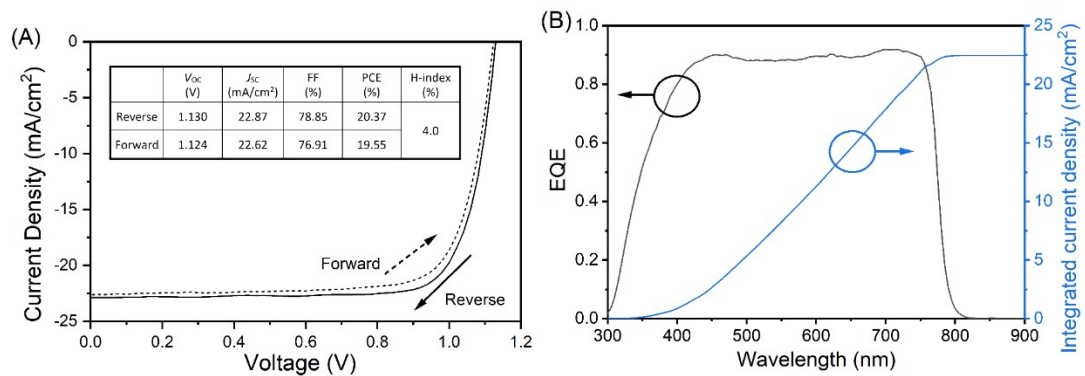

**Fig. S1** (A)  $J$ - $V$  characteristics and (B) EQE spectra of PSCs in a glovebox under room temperature and AM1.5G illumination

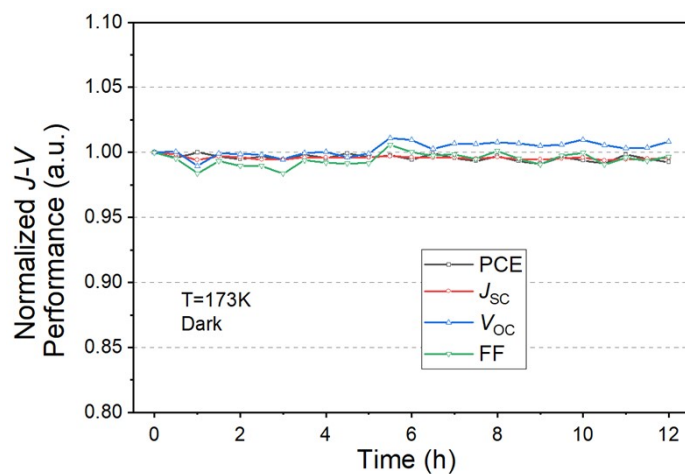

**Fig. S2** (A) Normalized  $J$ - $V$  performance of non-encapsulated devices under simulated Martian nighttime (173 K dark). It is dark most of the time, except when  $J$ - $V$  measurement is in progress.
